# Supplementary material for: Tuning the electrocatalytic hydrogen evolution reaction promoted by [Mo2O2S2]-based molybdenum cycles in aqueous medium
Source: Royal Society of Chemistry journal article supplement (doi:10.1039/c2dt32447d), 2012-12-12
Supplement: c2dt32447d.pdf [file c2dt32447d.pdf]

**Tuning the Electrocatalytic Hydrogen Evolution  
Reaction promoted by [Mo<sub>2</sub>O<sub>2</sub>S<sub>2</sub>]-based molybdenum cycles  
in aqueous medium.**

Akram Hijazi,<sup>a,b</sup> Justin Claude Kemmegne-Mbouguen,<sup>a,c</sup>  
Sébastien Floquet,<sup>\*a</sup> Jérôme Marrot,<sup>a</sup> Jennifer Fize,<sup>d</sup> Vincent  
Artero,<sup>d</sup> Olivier David,<sup>a</sup> Emmanuel Magnier,<sup>a</sup> Bruce Pégot,<sup>a</sup> and  
Emmanuel Cadot<sup>a</sup>

a) Institut Lavoisier de Versailles, UMR 8180, Université de  
Versailles Saint-Quentin en Yvelines, 45 avenue des  
Etats-Unis, 78035 Versailles Cedex, France. E-mails:  
[sebastien.floquet@chimie.uvsq.fr](mailto:sebastien.floquet@chimie.uvsq.fr)

b) Lebanese University, Doctoral School of Science and  
Technology, Research Platform for Environmental Science  
(PRASE), Beirut, Lebanon.

c) Laboratoire de Chimie Analytique, Faculté des Sciences,  
Université de Yaoundé I, B.P. 812, Yaoundé, Cameroon.

d) Laboratoire de Chimie et Biologie des Métaux, UMR 5249,  
Université Joseph Fourier, Grenoble 1 - CNRS - CEA, 17  
rue des Martyrs, 38054 Grenoble Cedex 9, France.

***Supporting Information***

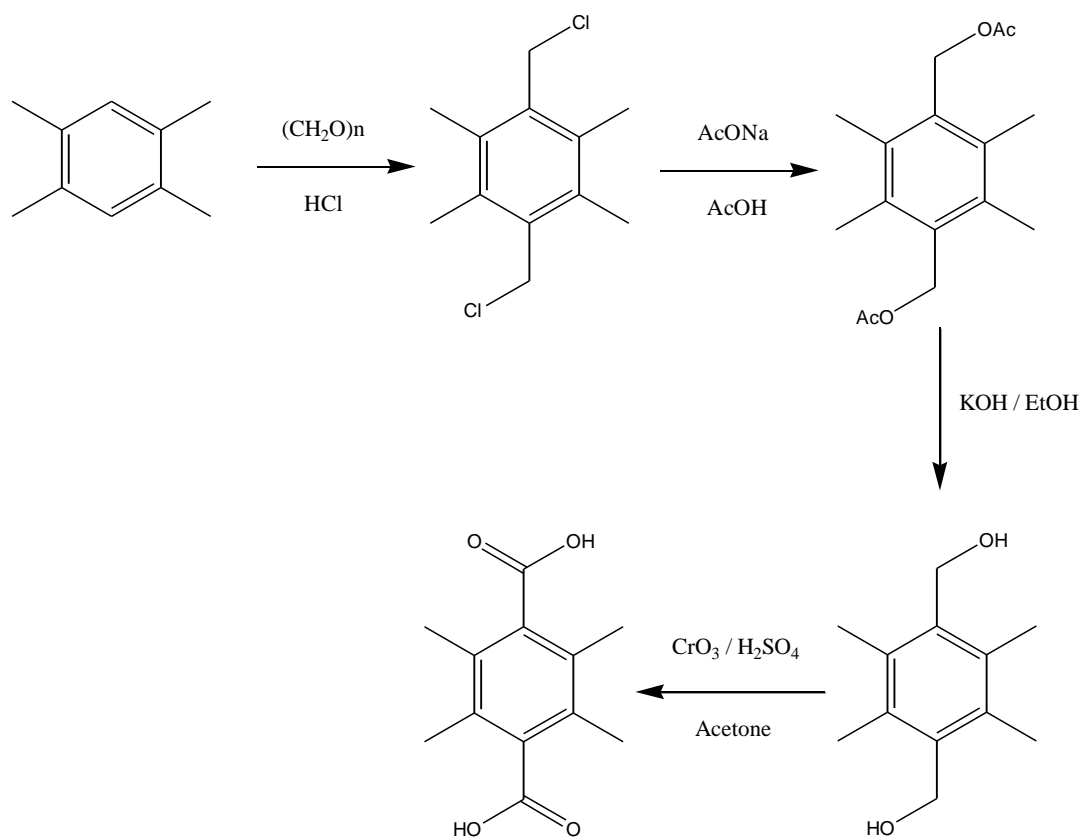

**Scheme S1. Multi-Step synthesis procedure of the ligand H<sub>2</sub>TMT.**

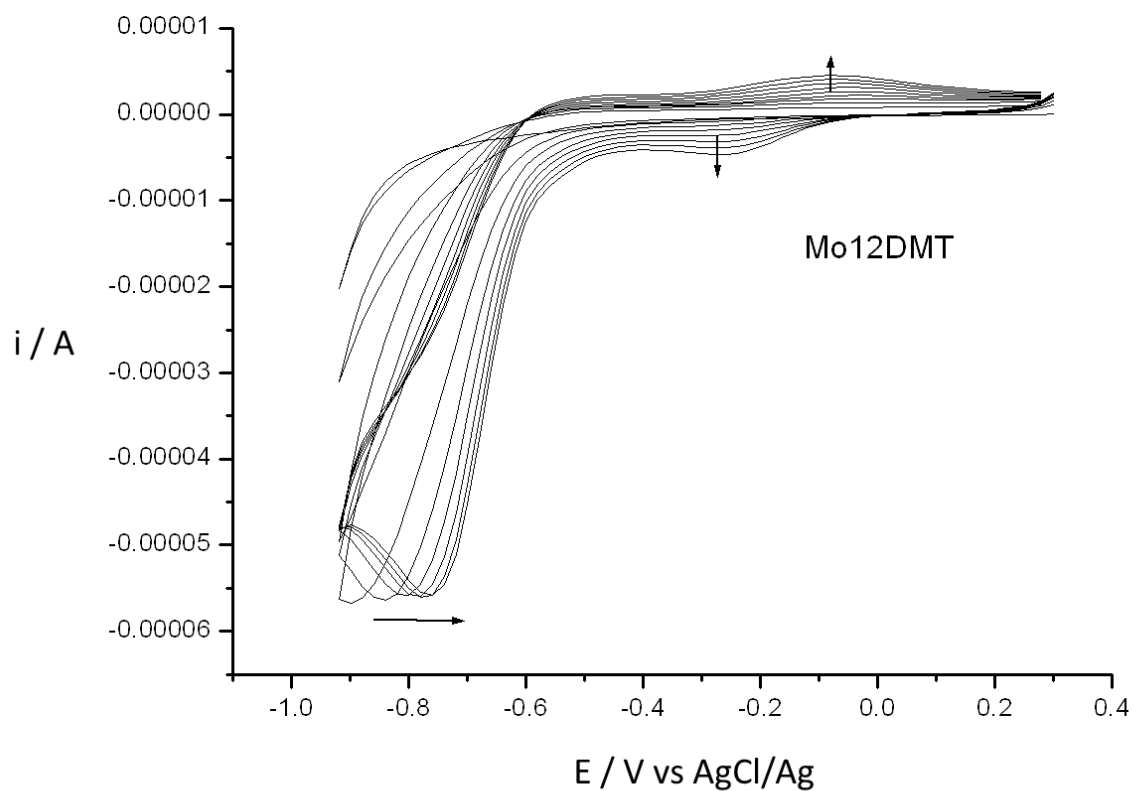

**Figure S1.** CV recorded in aqueous medium at pH = 3 for the compound 1. Scan rate was  $100 \text{ mV}\cdot\text{s}^{-1}$ . The figure evidences the non reproducibility of the CV and the likely formation of a deposit onto the surface of the glassy carbon electrode.

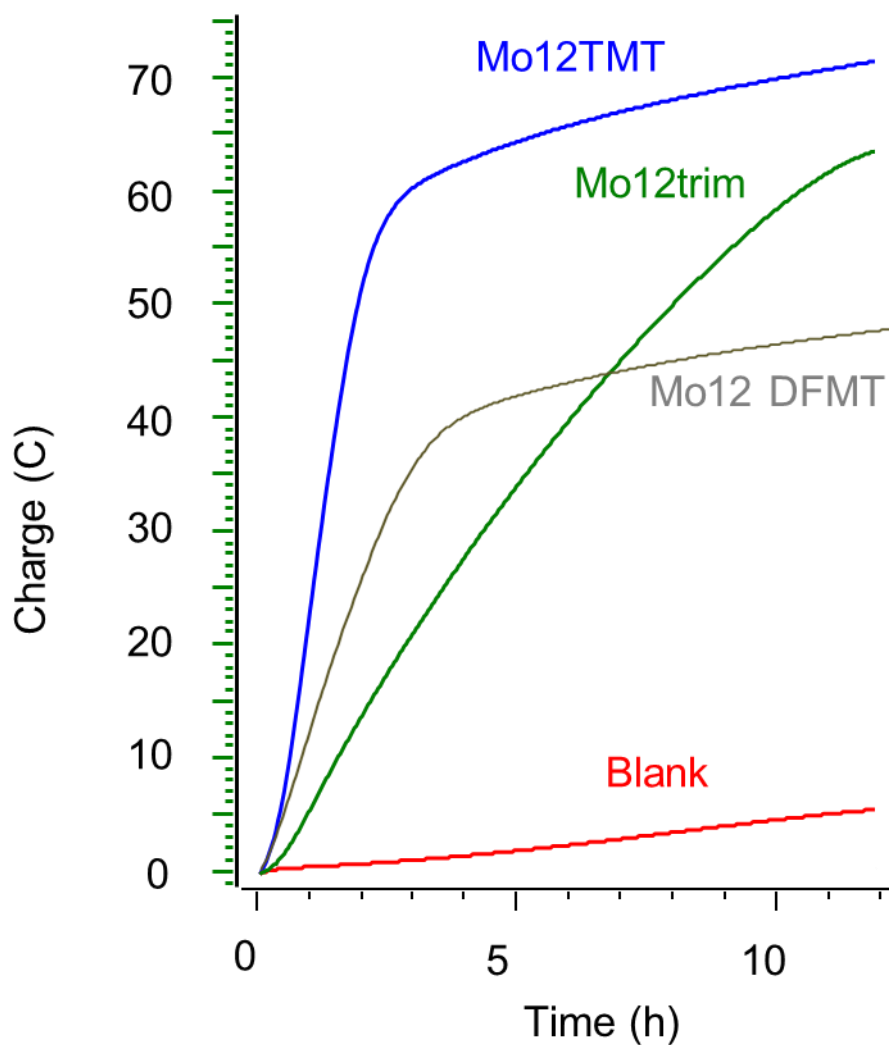

Figure S2. Variation of charge during the electrolysis at  $E = -0.8$  V vs Ag/AgCl at pH = 2 of solution of **2** (grey), **4** (blue) and **5** (green) in comparison with the same experiment performed without compound.

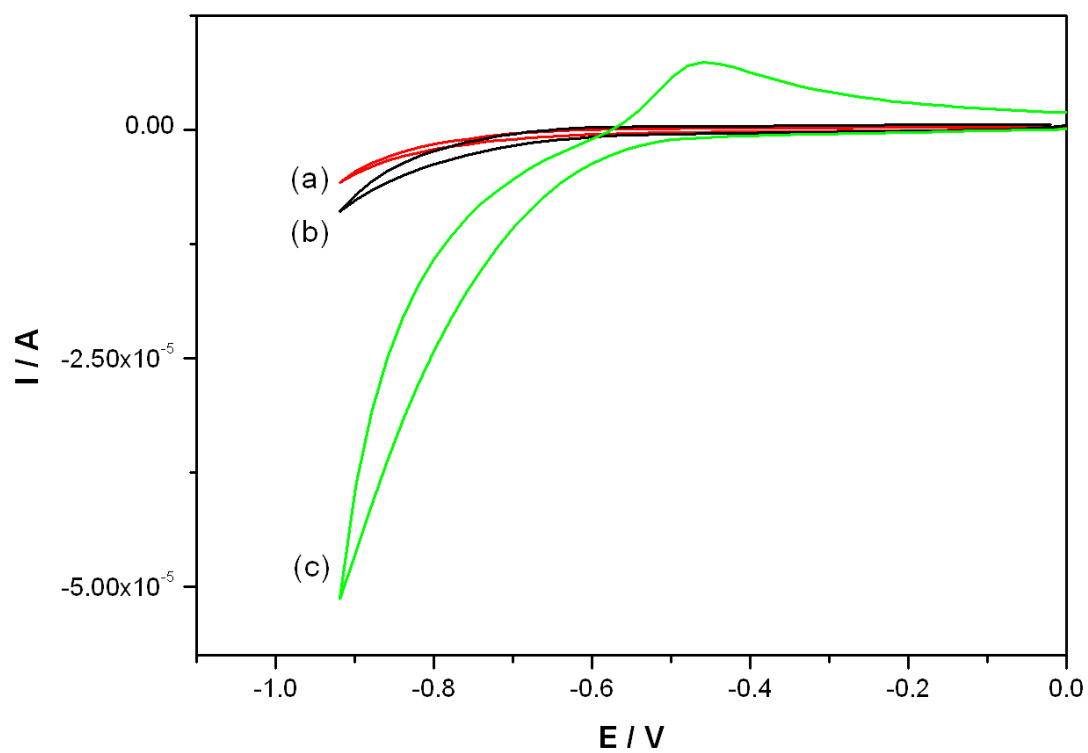

**Figure S3.** Comparison of the CV recorded in aqueous medium at pH = 3 for the compounds 2 (a), 4 (b) and 5 (c). Scan rate was 100 mV.s<sup>-1</sup>.
